# Supplementary material for: Improving particle collection efficiency of sampling wipes used for trace chemical detection
Source: Royal Society of Chemistry journal article supplement (doi:10.1039/d1ay01609a), 2021-12-31
Supplement: d1ay01609a1.pdf [file d1ay01609a1.pdf]

## Supporting Information for: Improving Particle Collection Efficiency of Sampling Wipes used for Trace Chemical Detection

Greg Gillen, Jeffrey Lawrence, Edward Sisco, Matthew E. Staymates, Jennifer Verkouteren and  
Elizabeth L. Robinson and Alexander Bulk\*

Surface and Trace Chemical Analysis Group  
National Institute of Standards and Technology  
Gaithersburg, MD 20899  
[greg.gillen@nist.gov](mailto:greg.gillen@nist.gov)

\*Building Energy Sciences Group  
The National Renewable Energy Laboratory  
Golden, CO 80401

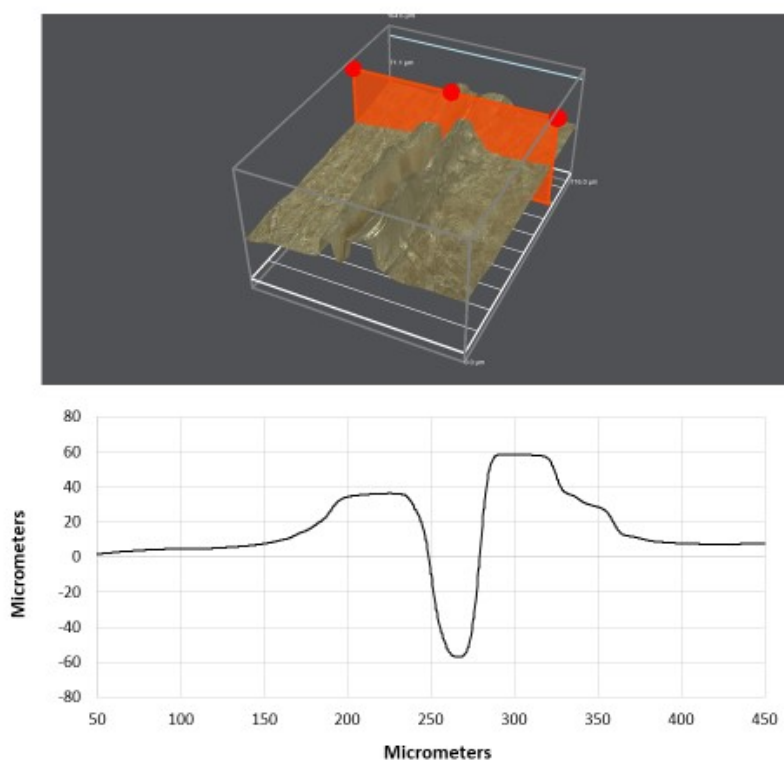

Figure S1 (top). 3D image of score topography in CN swipes. Field-of-view 450  $\mu\text{m}$  x 716  $\mu\text{m}$ . Image is a 3D optical reconstruction consisting of 46 images taken with 5  $\mu\text{m}$  vertical spacing. Figure S1(bottom). Line scan through indicated region on image showing topography of score cut.
